# Supplementary material
Source: PubMed Central journal article supplement (PMC4827279)
Supplement: Supp_Figure1.pdf [file Supp_Figure1.pdf]

## Supplementary Data

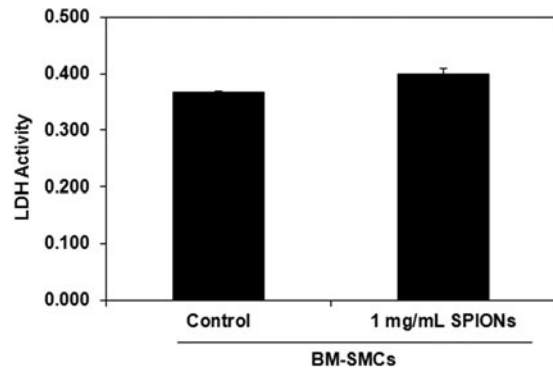

**SUPPLEMENTARY FIG. S1.** LDH assay showing lack of cytotoxic effects of SPIONs at the highest tested concentration (1 mg/mL). Plot showing the LDH activity in control-unlabeled BM-SMCs and SPION-BM-SMCs (1 mg/mL). Values shown are mean  $\pm$  SD from  $n=3$  replicate cultures/case. LDH, lactate dehydrogenase.
