# Supplementary material
Source: PubMed Central journal article supplement (PMC4827279)
Supplement: Supp_Figure2.pdf [file Supp_Figure2.pdf]

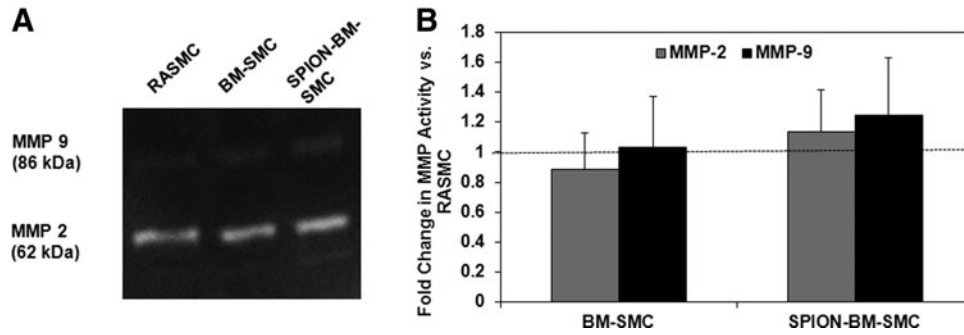

**SUPPLEMENTARY FIG. S2.** Gel zymography showing no significant upregulation in activity of MMP2 and 9 between BM-SMCs and SPION-BM-SMCs. **(A)** Representative gel zymogram containing active MMP2 and 9 bands. **(B)** Plot showing the fold change in active MMP2 and 9 levels relative to control RASMCs (assigned to unity - indicated as dotted line). Values indicated are mean  $\pm$  SD obtained from  $n=3$  replicate cultures/condition. BM-SMCs, bone marrow mesenchymal stem cell-derived SMCs; MMP, matrix metalloproteases; RASMC, rat aortic smooth muscle cells; SD, standard deviation; SMCs, smooth muscle cells; SPION, super paramagnetic iron oxide nanoparticle.
